# Supplementary material
Source: ML conference proceedings conference paper supplement (https://proceedings.mlr.press/v48/katariya16.html)
Supplement: Supplementary file [file katariya16-supp.pdf]

## A. Proofs

**Lemma 1.** Let  $x, y \in [0, 1]^K$  satisfy  $x \geq y$ . Then

$$V(x) - V(y) \leq \sum_{k=1}^K x_k - \sum_{k=1}^K y_k.$$

*Proof.* Let  $x = (x_1, \dots, x_K)$  and

$$d(x) = \sum_{k=1}^K x_k - V(x) = \sum_{k=1}^K x_k - \left[ 1 - \prod_{k=1}^K (1 - x_k) \right].$$

Our claim can be proved by showing that  $d(x) \geq 0$  and  $\frac{\partial}{\partial x_i} d(x) \geq 0$ , for any  $x \in [0, 1]^K$  and  $i \in [K]$ . First, we show that  $d(x) \geq 0$  by induction on  $K$ . The claim holds trivially for  $K = 1$ . For any  $K \geq 2$ ,

$$d(x) = \sum_{k=1}^{K-1} x_k - \left[ 1 - \prod_{k=1}^{K-1} (1 - x_k) \right] + \underbrace{x_K - x_K \prod_{k=1}^{K-1} (1 - x_k)}_{\geq 0} \geq 0,$$

where  $\sum_{k=1}^{K-1} x_k - \left[ 1 - \prod_{k=1}^{K-1} (1 - x_k) \right] \geq 0$  holds by our induction hypothesis. Second, we note that

$$\frac{\partial}{\partial x_i} d(x) = 1 - \prod_{k \neq i} (1 - x_k) \geq 0.$$

This concludes our proof. ■

**Lemma 2.** Let  $x, y \in [0, p_{\max}]^K$  satisfy  $x \geq y$ . Then

$$\alpha \left[ \sum_{k=1}^K x_k - \sum_{k=1}^K y_k \right] \leq V(x) - V(y),$$

where  $\alpha = (1 - p_{\max})^{K-1}$ .

*Proof.* Let  $x = (x_1, \dots, x_K)$  and

$$d(x) = V(x) - \alpha \sum_{k=1}^K x_k = 1 - \prod_{k=1}^K (1 - x_k) - (1 - p_{\max})^{K-1} \sum_{k=1}^K x_k.$$

Our claim can be proved by showing that  $d(x) \geq 0$  and  $\frac{\partial}{\partial x_i} d(x) \geq 0$ , for any  $x \in [0, p_{\max}]^K$  and  $i \in [K]$ . First, we show that  $d(x) \geq 0$  by induction on  $K$ . The claim holds trivially for  $K = 1$ . For any  $K \geq 2$ ,

$$d(x) = 1 - \prod_{k=1}^{K-1} (1 - x_k) - (1 - p_{\max})^{K-1} \sum_{k=1}^{K-1} x_k + \underbrace{x_K \prod_{k=1}^{K-1} (1 - x_k) - x_K (1 - p_{\max})^{K-1}}_{\geq 0} \geq 0,$$

where  $1 - \prod_{k=1}^{K-1} (1 - x_k) - (1 - p_{\max})^{K-1} \sum_{k=1}^{K-1} x_k \geq 0$  holds because  $1 - \prod_{k=1}^{K-1} (1 - x_k) - (1 - p_{\max})^{K-2} \sum_{k=1}^{K-1} x_k \geq 0$ ,

which holds by our induction hypothesis; and the remainder is non-negative because  $1 - x_k \geq 1 - p_{\max}$  for any  $k \in [K]$ . Second, note that

$$\frac{\partial}{\partial x_i} d(x) = \prod_{k \neq i} (1 - x_k) - (1 - p_{\max})^{K-1} \geq 0.$$

This concludes our proof. ■

**Lemma 3.** Let  $x \in [0, 1]^K$  and  $x'$  be the permutation of  $x$  whose entries are in decreasing order,  $x'_1 \geq \dots \geq x'_K$ . Let the entries of  $c \in [0, 1]^K$  be in decreasing order. Then

$$V(c \odot x') - V(c \odot x) \leq \sum_{k=1}^K c_k x'_k - \sum_{k=1}^K c_k x_k.$$

*Proof.* Note that our claim is equivalent to proving

$$1 - \prod_{k=1}^K (1 - c_k x'_k) - \left[ 1 - \prod_{k=1}^K (1 - c_k x_k) \right] \leq \sum_{k=1}^K c_k x'_k - \sum_{k=1}^K c_k x_k.$$

If  $x = x'$ , our claim holds trivially. If  $x \neq x'$ , there must exist indices  $i$  and  $j$  such that  $i < j$  and  $x_i < x_j$ . Let  $\tilde{x}$  be the same vector as  $x$  where entries  $x_i$  and  $x_j$  are exchanged,  $\tilde{x}_i = x_j$  and  $\tilde{x}_j = x_i$ . Since  $i < j$ ,  $c_i \geq c_j$ . Let

$$X_{-i,-j} = \prod_{k \neq i,j} (1 - c_k x_k).$$

Then

$$\begin{aligned} 1 - \prod_{k=1}^K (1 - c_k x'_k) - \left[ 1 - \prod_{k=1}^K (1 - c_k x_k) \right] &= X_{-i,-j} ((1 - c_i x_i)(1 - c_j x_j) - (1 - c_i \tilde{x}_i)(1 - c_j \tilde{x}_j)) \\ &= X_{-i,-j} ((1 - c_i x_i)(1 - c_j x_j) - (1 - c_i x_j)(1 - c_j x_i)) \\ &= X_{-i,-j} (-c_i x_i - c_j x_j + c_i x_j + c_j x_i) \\ &= X_{-i,-j} (c_i - c_j)(x_j - x_i) \\ &\leq (c_i - c_j)(x_j - x_i) \\ &= c_i x_j + c_j x_i - c_i x_i - c_j x_j \\ &= c_i \tilde{x}_i + c_j \tilde{x}_j - c_i x_i - c_j x_j \\ &= \sum_{k=1}^K c_k \tilde{x}_k - \sum_{k=1}^K c_k x_k, \end{aligned}$$

where the inequality is by our assumption that  $(c_i - c_j)(x_j - x_i) \geq 0$ . If  $\tilde{x} = x'$ , we are finished. Otherwise, we repeat the above argument until  $x = x'$ . ■

**Lemma 4.** Let  $x, y \in [0, 1]^K$  satisfy  $x \geq y$ . Let  $\gamma \in [0, 1]$ . Then

$$V(\gamma x) - V(\gamma y) \geq \gamma[V(x) - V(y)].$$

*Proof.* Note that our claim is equivalent to proving

$$\prod_{k=1}^K (1 - \gamma y_k) - \prod_{k=1}^K (1 - \gamma x_k) \geq \gamma \left[ \prod_{k=1}^K (1 - y_k) - \prod_{k=1}^K (1 - x_k) \right].$$

The proof is by induction on  $K$ . To simplify exposition, we define the following shorthands

$$X_i = \prod_{k=1}^i (1 - x_k), \quad X_i^\gamma = \prod_{k=1}^i (1 - \gamma x_k), \quad Y_i = \prod_{k=1}^i (1 - y_k), \quad Y_i^\gamma = \prod_{k=1}^i (1 - \gamma y_k).$$

Our claim holds trivially for  $K = 1$  because

$$(1 - \gamma y_1) - (1 - \gamma x_1) = \gamma[(1 - y_1) - (1 - x_1)].$$

To prove that the claim holds for any  $K$ , we first rewrite  $Y_K^\gamma - X_K^\gamma$  in terms of  $Y_{K-1}^\gamma - X_{K-1}^\gamma$  as

$$\begin{aligned} Y_K^\gamma - X_K^\gamma &= (1 - \gamma y_K)Y_{K-1}^\gamma - (1 - \gamma x_K)X_{K-1}^\gamma \\ &= Y_{K-1}^\gamma - \gamma y_K Y_{K-1}^\gamma - X_{K-1}^\gamma + \gamma y_K X_{K-1}^\gamma + \gamma(x_K - y_K)X_{K-1}^\gamma \\ &= (1 - \gamma y_K)(Y_{K-1}^\gamma - X_{K-1}^\gamma) + \gamma(x_K - y_K)X_{K-1}^\gamma. \end{aligned}$$

By our induction hypothesis,  $Y_{K-1}^\gamma - X_{K-1}^\gamma \geq \gamma(Y_{K-1} - X_{K-1})$ . Moreover,  $X_{K-1}^\gamma \geq X_{K-1}$  and  $1 - \gamma y_K \geq 1 - y_K$ . We apply these lower bounds to the right-hand side of the above equality and then rearrange it as

$$\begin{aligned} Y_K^\gamma - X_K^\gamma &\geq \gamma(1 - y_K)(Y_{K-1} - X_{K-1}) + \gamma(x_K - y_K)X_{K-1} \\ &= \gamma[(1 - y_K)Y_{K-1} - (1 - y_K + y_K - x_K)X_{K-1}] \\ &= \gamma[Y_K - X_K]. \end{aligned}$$

This concludes our proof. ■
